# Supplementary material for: Membrane-Bound Vimentin Filaments Reorganize and Elongate under Strain
Source: PubMed Central journal article supplement (PMC10265653; doi:10.1021/acs.biomac.3c00025), 2023-05-03
Supplement: bm3c00025_si_001.pdf [file bm3c00025_si_001.pdf]

SUPPORTING INFORMATION

# Membrane-bound vimentin filaments reorganize and elongate under strain

Sarmini Nageswaran,<sup>1</sup> Juliane Haipeter,<sup>1</sup> Jonathan F. E. Bodenschatz,<sup>1</sup> Ruth Meyer,<sup>2</sup>

Sarah Köster,<sup>2</sup> Claudia Steinem<sup>1\*</sup>

<sup>1</sup> Institute for Organic and Biomolecular Chemistry, University of Göttingen, Tammannstr. 2,  
37077 Göttingen, Germany

<sup>2</sup> Institute for X-Ray Physics, University of Göttingen, Friedrich-Hund-Platz 1,  
37077 Göttingen, Germany

**Contour and apparent persistence lengths of VIFs.** Contour and apparent persistence lengths of membrane-bound VIFs were determined using the plugin *JFilament (ImageJ)* (Figure S1).

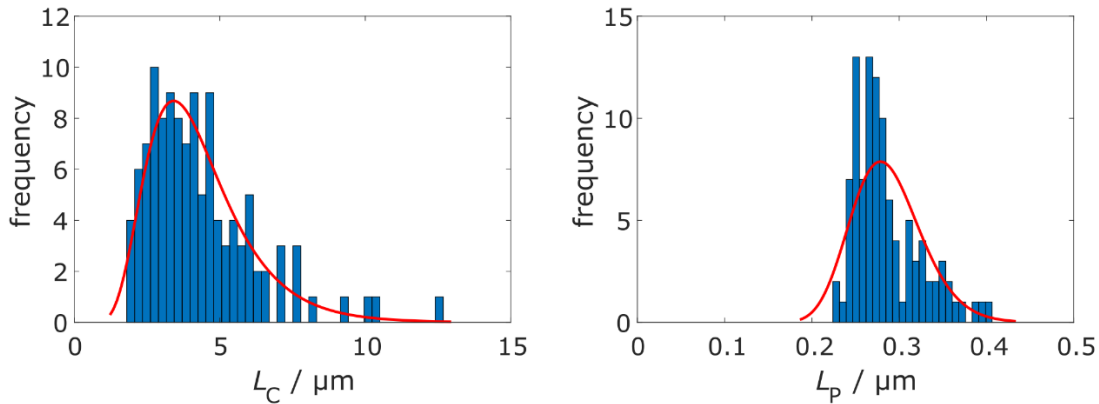

**Figure S1.** Contour lengths  $L_C$  and apparent persistence lengths  $L_P$  of membrane-bound VIFs. An average contour length of  $L_C = 4.3 \pm 1.9 \mu\text{m}$  ( $\pm$  STD) ( $N = 116$ , left) and an average apparent persistence length of  $L_P = 0.3 \pm 0.04 \mu\text{m}$  ( $\pm$  STD) ( $N = 91$ , right) was determined.

**Membrane stretching in the absence of SUVs.** In the absence of the SUVs serving as a lipid reservoir, the PDMS-supported bilayer forms defects upon uniaxial stretch up to  $mp = 10$  mm (Figure S2). The number and size of these defects increase with the increasing motor position. The motor position, at which the first defect is formed, is between  $mp = 1-3$  mm ( $\epsilon_{beads,yy} = 3.4-10.1\%$ ).

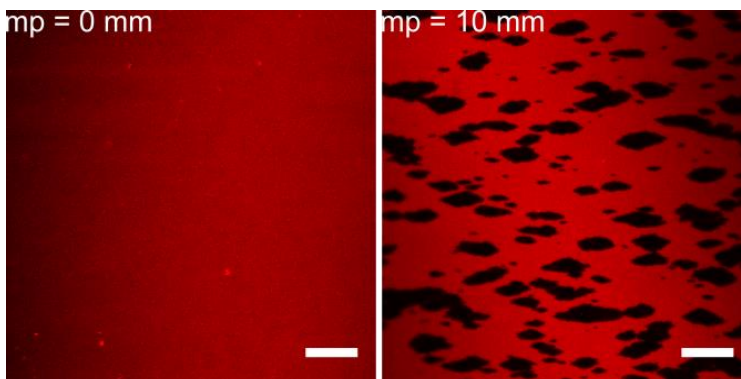

**Figure S2.** Fluorescence micrographs of PDMS-supported lipid bilayers composed of POPC/DOPE-biotin-cap/ATTO647 (96/3/1,  $n/n$ ) upon uniaxial stretching at slow stretching speed ( $v = 20 \mu\text{m s}^{-1}$ ). The fluorescence is homogeneously distributed in the unstretched state ( $mp = 0$  mm, left). Upon stretching ( $mp = 10$  mm, right), defects are formed visible as black areas; scale bars:  $10 \mu\text{m}$ .

**Membrane stretching in the presence of SUVs.** In the presence of a lipid reservoir (SUVs), defect formation was reduced upon stretching as a result of the integration of lipid material originating from the SUVs in the planar lipid bilayer (Figure S3). The results were independent of the stretching velocity.

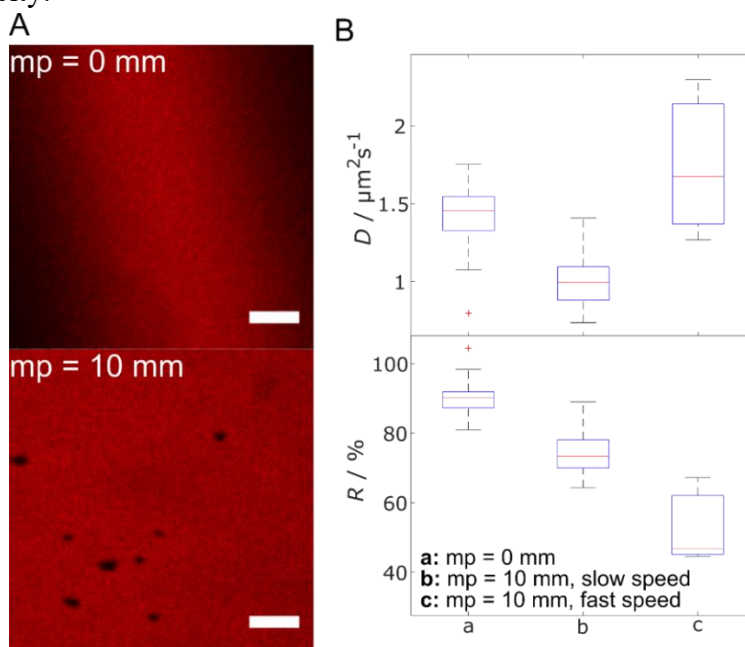

**Figure S3.** Fluorescence analysis of PDMS-supported lipid bilayers composed of POPC/DOPE-biotin-cap/ATTO647 (96/3/1,  $n/n$ ) upon uniaxial stretching in the presence of SUVs (A) Exemplary fluorescence micrographs at  $mp = 0$  mm and  $mp = 10$  mm. Stretching speed:  $v = 20 \mu\text{m s}^{-1}$ ; scale bars:  $5 \mu\text{m}$ . (B) Box plots of diffusion constants  $D$  and mobile fractions  $R$  in the unstretched (a:  $D = 1.4 \pm 0.2 \mu\text{m}^2 \text{s}^{-1}$ ,  $R = 91 \pm 6\%$ ,  $N = 15$ ) and stretched state (b:  $D = 1.0 \pm 0.2 \mu\text{m}^2 \text{s}^{-1}$ ,  $R = 74 \pm 7\%$ ,  $N = 15$ ); c:  $D = 1.7 \pm 0.5 \mu\text{m}^2 \text{s}^{-1}$ ,  $R = 53 \pm 13\%$ ,  $N = 3$ ).

**Membrane stretching with attached VIFs in the presence of SUVs.** Lipid bilayers with attached VIFs show more defects after stretching than those without an attached VIF network (Figure S4).

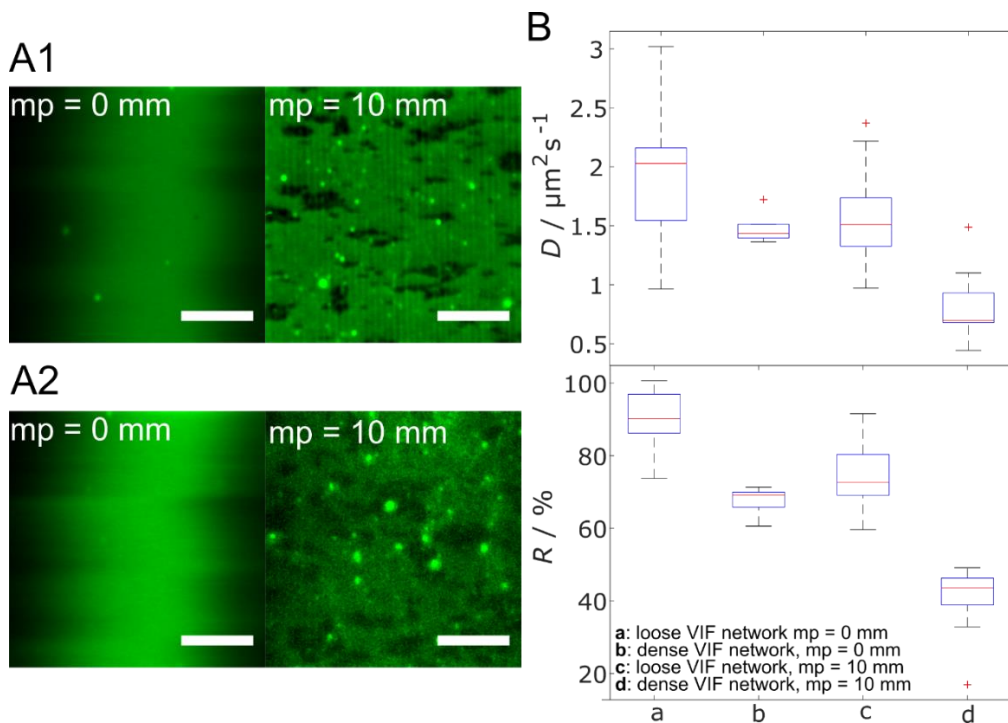

**Figure S4.** (A) Fluorescence micrographs of an unstretched ( $mp = 0 \text{ mm}$ ) and a stretched ( $mp = 10 \text{ mm}$ ) supported lipid bilayer (**A1**) with a loose VIF network, and (**A2**) with a dense VIF network stretched with a velocity of  $750 \mu\text{m s}^{-1}$ . Lipid composition: POPC/DOPE-biotin-cap/ATTO488 (96/3/1,  $n/n$ ). Scale bars:  $5 \mu\text{m}$ . (B) Diffusion coefficients  $D$  and mobile fractions  $R$  for different scenarios. **a:**  $D = 1.9 \pm 0.5 \mu\text{m}^2 \text{s}^{-1}$ ,  $R = 90 \pm 8\%$  ( $N = 37$ ); **b:**  $D = 1.5 \pm 0.1 \mu\text{m}^2 \text{s}^{-1}$ ,  $R = 68 \pm 4\%$  ( $N = 5$ ); **c:**  $D = 1.5 \pm 0.3 \mu\text{m}^2 \text{s}^{-1}$ ,  $R = 74 \pm 8\%$  ( $N = 33$ ); **d:**  $D = 0.8 \pm 0.3 \mu\text{m}^2 \text{s}^{-1}$ ,  $R = 41 \pm 10\%$  ( $N = 5$ ).

**Relaxation of stretched membranes.** To support the idea of additional lipid material in the bilayer, relaxation experiments of membrane-bound VIFs were performed. Fluorescence micrographs reveal that formed defects, discernable as black areas, disappear, and lipid material is protruded from the bilayer (Figure S5).

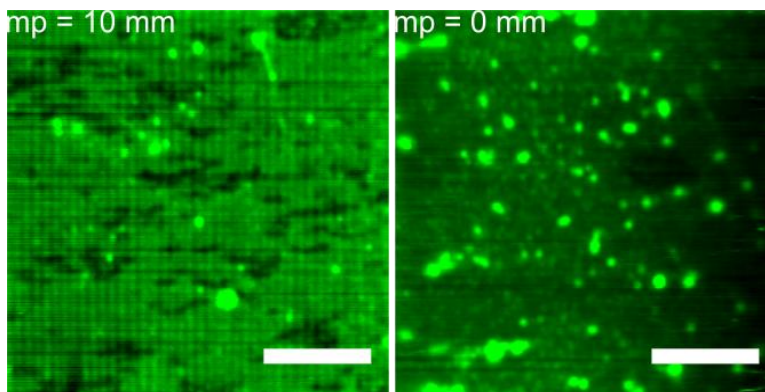

**Figure S5.** Relaxation of a stretched supported lipid bilayer (POPC/DOPE-biotin-cap/ATTO488 (96/3/1,  $n/n$ ) with VIFs from  $mp = 10 \text{ mm}$  (left) to  $mp = 0 \text{ mm}$  (right); scale bars:  $5 \mu\text{m}$ .
